# Supplementary material for: Influence of nutrition pattern on exercise performance, inflammation and muscle damage biomarkers in a non-trained healthy young cohort
Source: Research Square preprint supplement (doi:10.21203/rs.3.rs-7241787/v1), 2025-09-02
Supplement: Supplementary file 2 [file 821742751a70312106577fe9.docx]

**Additional file 2**

**Table S1**. Basal plasma levels of cytokines and muscle damage biomarkers.

|  | **All (n=78)** | **Female (n=45)** | **Male (n=33)** | **P** |
| --- | --- | --- | --- | --- |
| IL-1α (pg/ml) | 19.5 [10.7; 23.9] | 20.7 [10.7; 24.6] | 18.4 [10.8; 23.6] | 0.374 |
| IL-1β (pg/ml) | 0.11 [0.01; 0.36] | 0.05 [0.01; 0.33] | 0.18 [0.05; 0.44] | 0.225 |
| IL-6 (pg/ml) | 0.94 [0.65; 1.36] | 0.96 [0.65; 1.34] | 0.89 [0.64; 1.42] | 0.901 |
| IL-12 (pg/ml) | 0.14 [0.01; 0.35] | 0.07 [0.01; 0.40] | 0.20 [0.04; 0.35] | 0.463 |
| TNFα (pg/ml) | 7.36 [6.14; 8.29] | 6.83 [5.98; 8.11] | 7.79 [6.34; 8.69] | 0.126 |
| MCP-1 (pg/ml) | 258 [220; 333] | 244 [220; 295] | 296 [232; 349] | 0.133 |
| IL-1ra (pg/ml) | 937 [802; 1142] | 970 [818; 1111] | 932 [776; 1187] | 0.653 |
| IL-10 (pg/ml) | 2.02 [1.65; 2.47] | 1.89 [1.57; 2.22] | 2.33 [1.83; 2.95] | 0.155 |
| CK (U/l) | 669 [365; 1096] | 467 [309; 928] | 819 [531; 1201] | 0.107 |
| LDH (U/l) | 865 [429; 1279] | 865 [678; 1279] | 888 [80.5; 1337] | 0.408 |

The data show the median and interquartile range [Q1; Q3]. The P values ​​(P) were extracted by Mann-Whitney´s U test. Sample size (n).

**Table S2**. Rotated factor loading for basal plasma cytokines variables.

|  | **PC1** | **PC2** | **PC3** |
| --- | --- | --- | --- |
| IL-1α | -0.57+ | -0.41+ | 0.04 |
| IL-1β | 0.16 | -0.24 | 0.53+ |
| IL-6 | -0.16 | 0.44+ | -0.01 |
| IL-12 | -0.09 | 0.15 | 0.38+ |
| TNFα | -0.57+ | -0.38+ | 0.08 |
| MCP-1 | -0.40+ | 0.38+ | -0.34 |
| IL-1ra | -0.36 | 0.48+ | 0.26 |
| IL-10 | 0.04 | -0.21 | -0.62+ |

The data show the rotated weights of the cytokine on the principal component (PC). +The most variable contribution to PCs.

**Table S3**. Estimators of the initial structural equation model (SEM) for nutrients latent variable.

|  | **Estimate±SE** | **P** |  | **Estimate±SE** | **P** |
| --- | --- | --- | --- | --- | --- |
| Carbohydrates | 1.00 |  | PUFAs | 0.15±0.04 | <0.001 |
| Proteins | 0.37±0.12 | 0.001 | Insoluble fiber | 0.02±0.01 | 0.119 |
| Fats | 0.99±0.24 | 0.001 | Single sugars | -0.11±0.11 | 0.321 |
| SFAs | 0.34±0.08 | <0.001 | Folates | 0.03±0.27 | 0.927 |
| MUFAs | 0.41±0.11 | <0.001 | Vitamin D | 0.01±0.00 | 0.032 |
